# Supplementary material for: Strategy for Managing Industrial Anaerobic Sludge through the Heterotrophic Cultivation of Chlorella sorokiniana: Effect of Iron Addition on Biomass and Lipid Production
Source: MDPI journal article supplement (doi:10.3390/bioengineering8060082), 2021-06-10
Supplement: s1 [file s1]

Article

# Strategy for Managing Industrial Anaerobic Sludge through the Heterotrophic Cultivation of *Chlorella sorokiniana*: Effect of Iron Addition on Biomass and Lipid Production

Esteban Charria-Girón <sup>1</sup>, Vanessa Amazo <sup>1</sup>, Daniela De Angulo <sup>1</sup>, Eliana Hidalgo <sup>1</sup>, María Francisca Villegas-Torres <sup>2,3</sup>, Frank Baganz <sup>4</sup>, and Nelson. H. Caicedo <sup>1,3,\*</sup>

<sup>1</sup> Departamento de Ingeniería Bioquímica, Facultad de Ingeniería, Universidad Icesi, Calle 18 No. 122–135, 760031 Cali, Colombia; charria21@gmail.com (E.C.-G.); vaneaw\_806@hotmail.com (V.A.); daniela.deangulo@gmail.com (D.D.A.); ely.hidalgo999@gmail.com (E.H.)

<sup>2</sup> Departamento de Ciencias Químicas, Facultad de Ciencias Naturales, Universidad Icesi, Calle 18 No. 122–135, 760031 Cali, Colombia; mfvillegas@icesi.edu.co

<sup>3</sup> Centro BioInc, Universidad Icesi, Calle 18 No. 122–135, 760031 Cali, Colombia

<sup>4</sup> Department of Biochemical Engineering, University College London, Gordon Street, London WC1H 0AH, UK; f.baganz@ucl.ac.uk

\* Correspondence: nhcaicedo@icesi.edu.co; +57 318 754 8041

## Supplementary Materials

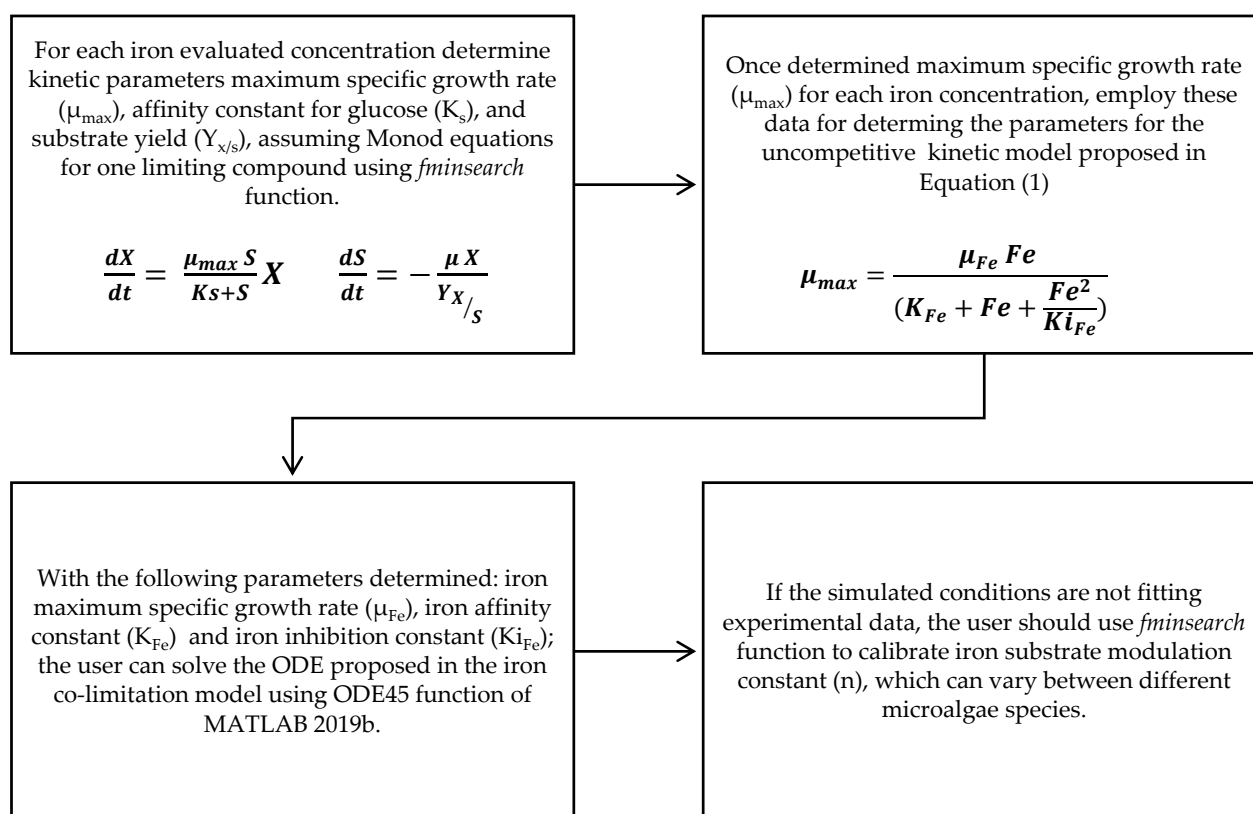

**Figure S1.** Flowchart on the computational methodology for adequate use of iron co-limitation model.

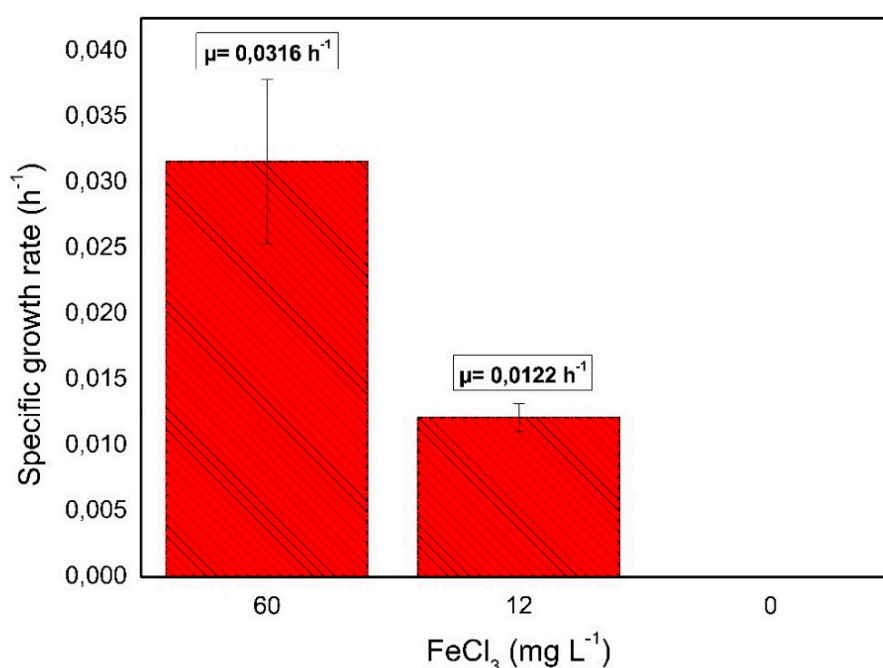

**Figure S2.** Specific growth rate increment calculated after iron addition (18–25 h) on the late exponential phase of the heterotrophic culture of *C.sorokiniana*.

**Table S1.** Mass balance equations for fed-batch bioaugmentation process; it is noting that substrate consumption for maintenance was assumed to be zero.

|                                           |                                                                                                           |
|-------------------------------------------|-----------------------------------------------------------------------------------------------------------|
| <b>Biomass growth mass balance</b>        | $\frac{dX}{dt} = \left( \mu - \frac{Fin}{V} \right) X$                                                    |
| <b>Substrate consumption mass balance</b> | $\frac{dS}{dt} = \frac{-1}{Y_{xs}} \mu X + (S_{feed} * Fin - S) \frac{Fin}{V}$                            |
| <b>Volume balance</b>                     | $\frac{dV}{dt} = Fin = Fo e^{\mu_* t}$                                                                    |
| <b>Initial flow rate</b>                  | $Fo = \frac{\frac{\mu_*}{Y_{xs}}}{(S_{feed} - S)} \begin{cases} 6h \\ 0h \end{cases} ; \mu = 0.13 h^{-1}$ |

Where X is the concentration of biomass (g L<sup>-1</sup>);  $\mu_*$  is the specific growth rate (h<sup>-1</sup>) fixed during the fed-batch; Fin is the feeding rate (h<sup>-1</sup>), for fed-batch cultivation; Fo is the initial feeding rate for exponential feeding profile (L min<sup>-1</sup>); V is the volume of the medium (L); Y<sub>xs</sub> is the substrate yield coefficient (g g<sup>-1</sup>); S is the glucose concentration (g L<sup>-1</sup>) and S<sub>in</sub> is the glucose concentration in the feed (g L<sup>-1</sup>).

**Supplementary Materials:** Figure S1: Flowchart on the computational methodology for adequate use of iron co-limitation model. Figure S2: Specific growth rate increment calculated after iron addition (18–25 h) on the late exponential phase of the heterotrophic

culture of *C. sorokiniana*. Table S1: mass balance equations for fed-batch simulations. The MATLAB code for ODE solution of the iron co-limitation model is available in <https://github.com/ECharria/IronModelMicroalgae/tree/main>.

**Author Contributions:** Conceptualization, E. C.-G., E. H., M. F.V.-T., F. B., and N. H. C. O.; Formal analysis, E. C.-G., V. A., E. H., M. F. V.-T., and N. H. C. O.; Funding acquisition, N. H. C. O.; Investigation, E. C.-G., V. A., E. H., M. F. V.-T., and N. H. C. O.; Methodology, E. C.-G., V. A., E. H., M. F. V.-T., and N. H. C. O.; Project administration, N. H. C. O.; Resources, N. H. C. O.; Software, E. C.-G.; Supervision, M. F. V.-T., and N. H. C. O.; Visualization, E. C.-G., and D. D.; Writing—original draft, E. C.-G., V. A., and D. D.; Writing—review & editing, E. C.-G., D. D. and N. H. C. O. All authors have read and agreed to the published version of the manuscript.

**Funding:** COLCIENCIAS: grant number 275908943 funded this research.

**Institutional Review Board Statement:** Not applicable.

**Informed Consent Statement:** Not applicable.

**Data Availability Statement:** The data generated or analyzed during this study are included in this article, and the corresponding author could provide the primary data upon request.

**Conflicts of Interest:** The authors declare no conflict of interest. The funders had no role in the study's design; in the collection, analyses, or interpretation of data, in the writing of the manuscript, or in the decision to publish the results.
